# Supplementary material
Source: PubMed Central journal article supplement (PMC4501910)
Supplement: NIHMS647054-supplement-supplement_1.pdf [file NIHMS647054-supplement-supplement_1.pdf]

examine the percentage of CD4<sup>+</sup> T-cells expressing the activation marker HLA-DR. Percentage of CD4<sup>+</sup> T-cells expressing HLA-DR was plotted against the relative amount of Proteobacteria found in the MLN. **b)** Viral loads were determined at the time of necropsy and charted versus relative amount of Proteobacteria.

**Supplementary Figure S1: Viral load of experimentally SIV-infected PTM.**

Plasma was collected longitudinally following challenge with SIV mac239 and used to determine plasma viral load by qRT-PCR.

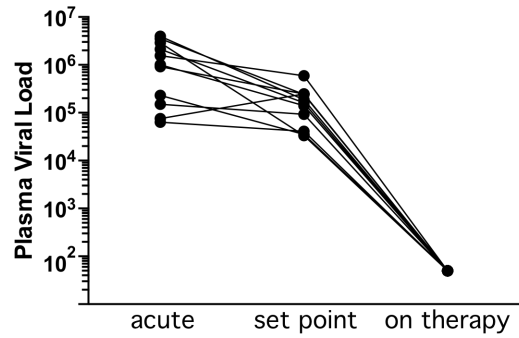

Supplementary Figure S1. **Viral load of experimentally SIV-infected PTM.** Plasma was collected longitudinally following infection with SIV mac239 and used to determine plasma viral load by qRT-PCR.
